# Supplementary material
Source: bioRxiv or medRxiv preprint supplement (https://medrxiv.org/content/medrxiv/early/2023/05/15/2023.04.12.23288344/DC1/embed/media-1.pdf)

**Independent Ethics Committee of Moscow Regional Office of the Russian Society  
of Radiologists and Radiographers**

28 Srednyaya Kalitnikovskaya St., bld. 1, Moscow; email: [ethics@npcmr.ru](mailto:ethics@npcmr.ru)

**Approval Number No. 2 (1-II-2020) of the meeting of  
IEC of RSRR MRO dated February 20, 2020**

**Present:** O.A. Agafonova, E.G. Bahteeva, A.S. Laipan, I.S. Komolov O.A. Mokienko,  
I.I. Nadelyaeva, L.A. Nizovtsova, O.V. Omelyanskaya, A.V. Petraikin

**Topics:** Expert review of the documents for the upcoming study titled the "Experiment on the use of innovative technologies in the field of computer vision for the analysis of medical images and further use in the healthcare system of Moscow."

**Documents submitted for review:**

1. The abstract of the study titled the "Experiment on the use of innovative technologies in the field of computer vision for the analysis of medical images and further use in the healthcare system of Moscow"
2. A cover letter to the attention of the Chairman of IEC of RSRR MRO concerning the ethical expert review of the study titled the "Experiment on the use of innovative technologies in the field of computer vision for the analysis of medical images and further use in the healthcare system of Moscow"
3. CV of the Principal Investigator
4. A patient information and informed consent form
5. A project overview.

**Resolution:** To approve the upcoming study titled the "Experiment on the use of innovative technologies in the field of computer vision for the analysis of medical images and further use in the healthcare system of Moscow."

***Due to the conflict of interest O.A. Agafonova, the co-implementer of the project, did not take part in the vote.***

Chair of IEC of RSRR MRO:



Supplement: Supplementary file [file media-1.pdf]
